# Supplementary material
Source: PubMed Central journal article supplement (PMC2886803)
Supplement: NIHMS199501-supplement-01.pdf [file NIHMS199501-supplement-01.pdf]

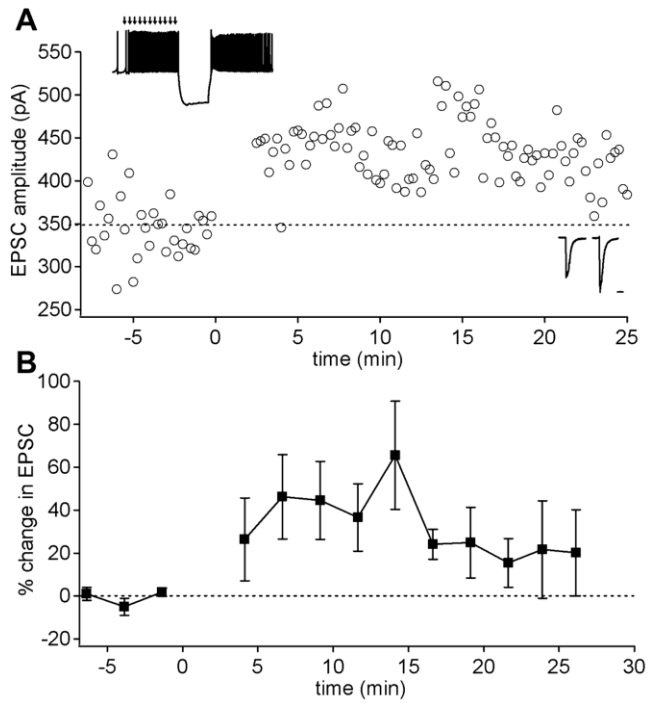

**Supplementary Figure 1 (related to Figure 1).** The standard induction protocol, consisting of a sequence of excitation, hyperpolarization and disinhibition, induces LTP in cerebellar nuclear neurons of young adult mice (P28-32). (A) EPSCs before and after the standard conditioning protocol. (B) Mean EPSC amplitudes before and after the conditioning protocol (n = 6).
